# Supplementary material for: Longitudinal Transcription Profiling of Bladder Cancers Dictate the Response to BCG Treatment and Disease Progression
Source: MDPI journal article supplement (doi:10.3390/ijms25010144), 2023-12-21
Supplement: s1 [file s1]

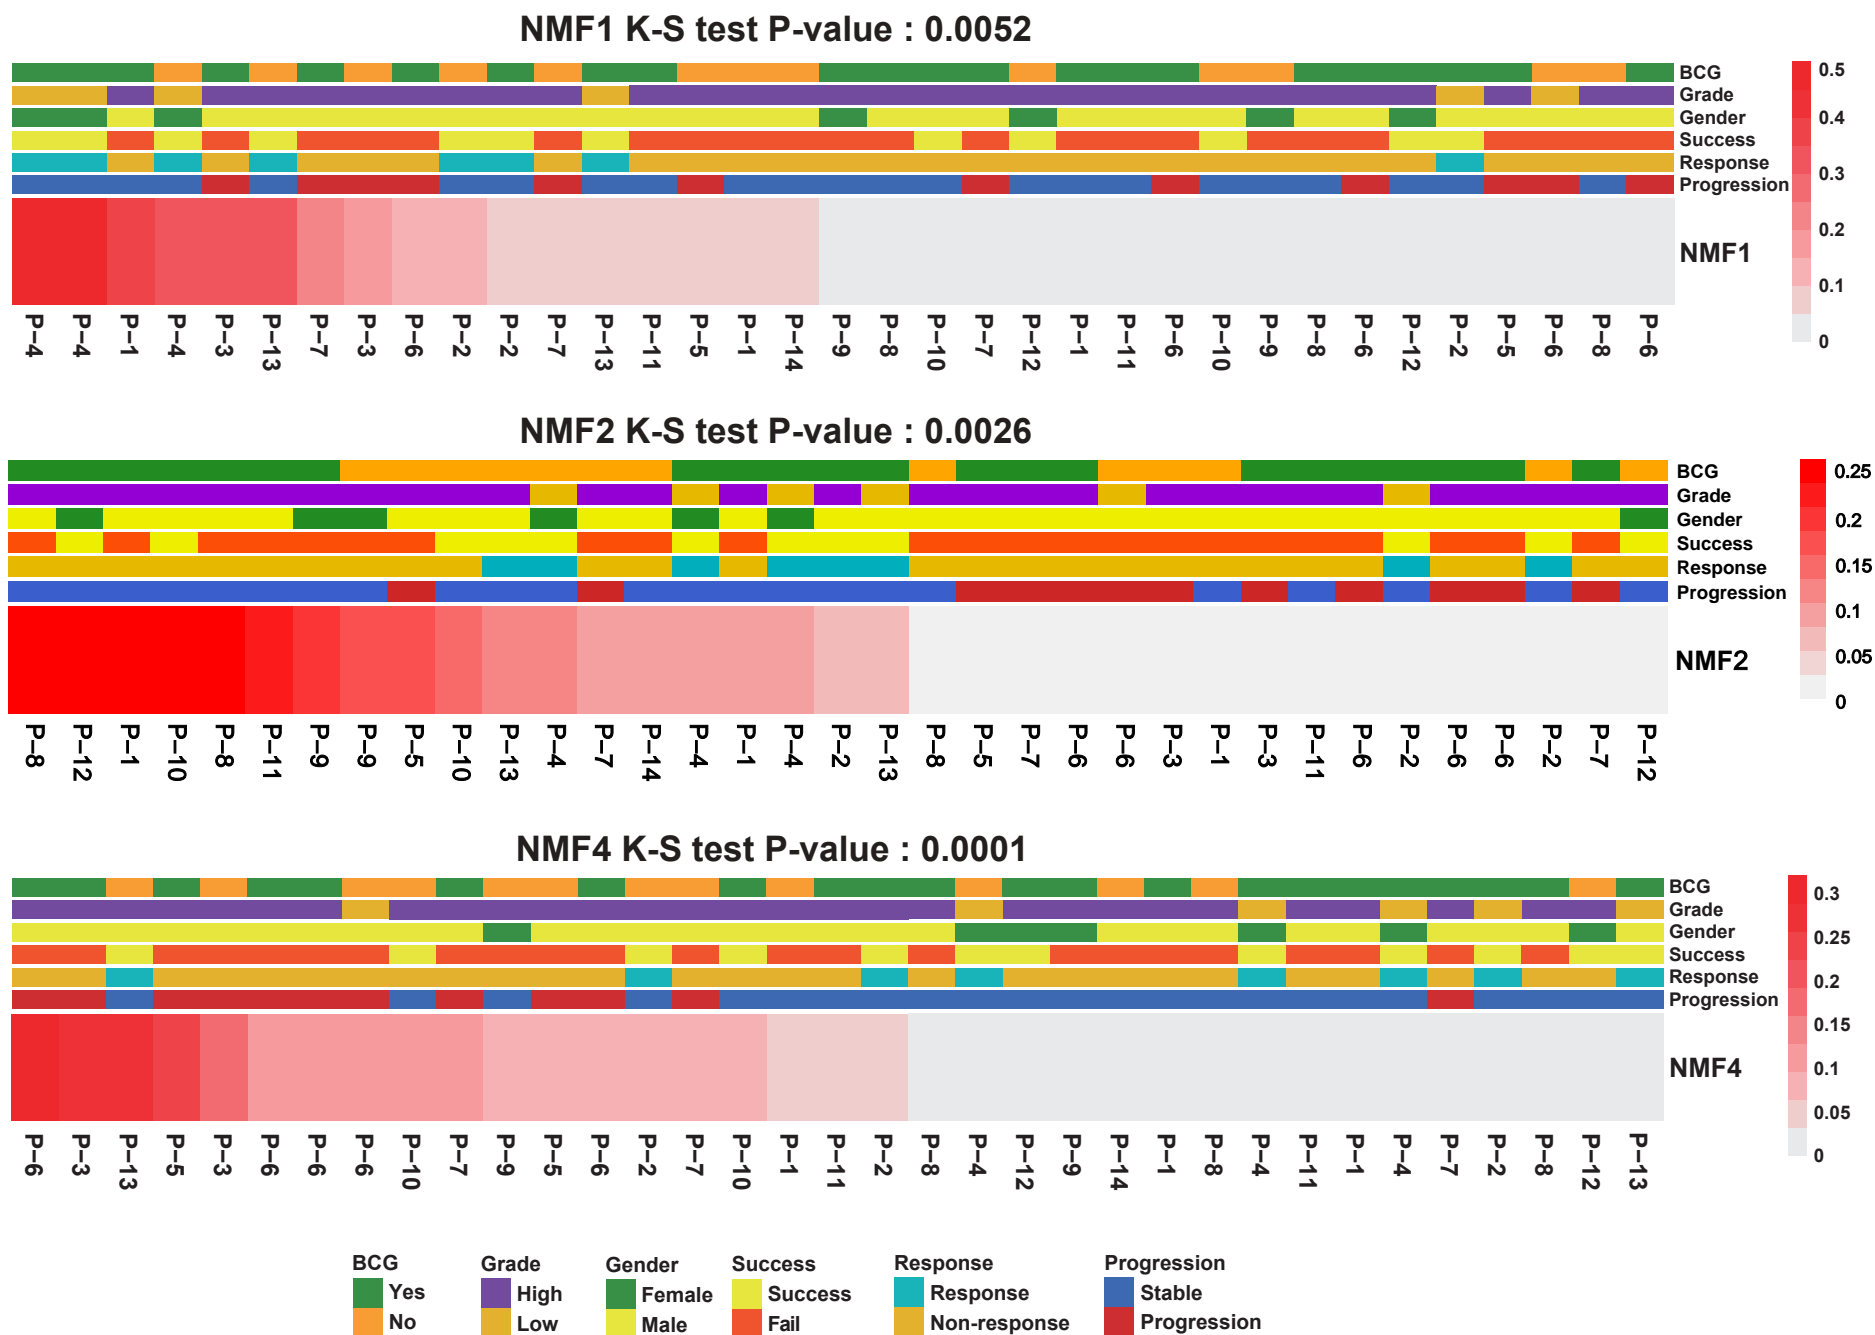

**Figure S2.** Visualization coefficients of NMF1, NMF2 and NMF4. A, Ordering the NMF1, NMF2, and NMF4 coefficients with the clinical course
